# Supplementary material for: Intramedullary Total Femur via a Direct Anterior Approach for Complex Revision Total Hip and Knee Arthroplasty
Source: PubMed Central journal article supplement — Arthroplast Today. 2024 Aug 2;28:101474. doi: 10.1016/j.artd.2024.101474 (PMC11345508; doi:10.1016/j.artd.2024.101474), 2024-08-02
Supplement: mmc3.pdf [file mmc3.pdf]

# INDIVIDUAL CONFLICT OF INTEREST STATEMENT

## *American Association of Hip and Knee Surgeons*

(Adopted from the American Academy of Orthopaedic Surgeons disclosure statement)

The following form **must be filled out completely and submitted by each author (example, 6 authors, 6 forms).**  
**All items require a response. If there is no relevant disclosure for a given item, enter "None."**

### Manuscript Title **Direct Anterior Cup-Half Cage For Revision And Complex Primary THA: Techniques And Early Outcomes**

---

1. Royalties from a company or supplier (The following conflicts were disclosed)  
none
2. Speakers bureau/paid presentations for a company or supplier (The following conflicts were disclosed)  
  
Medacta
- 3A. Paid employee for a company or supplier (The following conflicts were disclosed)
- 3B. Paid consultant for a company or supplier (The following conflicts were disclosed)  
  
Medacta
- 3C. Unpaid consultants for a company or supplier (The following conflicts were disclosed)  
none
4. Stock or stock options in a company or supplier (The following conflicts were disclosed)  
  
OrthoGrid
5. Research support from a company or supplier as a Principal Investigator (The following conflicts were disclosed)  
  
Zimmer Biomet, Stryker
6. Other financial or material support from a company or supplier (The following conflicts were disclosed)  
none
7. Royalties, financial or material support from publishers (The following conflicts were disclosed)  
none
8. Medical/Orthopaedic publications editorial/governing board (The following conflicts were disclosed)  
none
9. Board member/committee appointments for a society (The following conflicts were disclosed)  
none

#### **Each author must sign AND print or type his/her name, date and submit a separate form**

In addition, one BLINDED Conflict of Interest form (no author names used) should be submitted per manuscript with all author disclosures.

Lucas Anderson



5/16/2024

---

Author Name (Print or Type)

Author Signature

Date
